# Supplementary material
Source: PubMed Central journal article supplement (PMC3131326)
Supplement: 1107941108_pnas.201107941SI.pdf [file 1107941108_pnas.201107941SI.pdf]

# Supporting Information

Seubert et al. 10.1073/pnas.1107941108

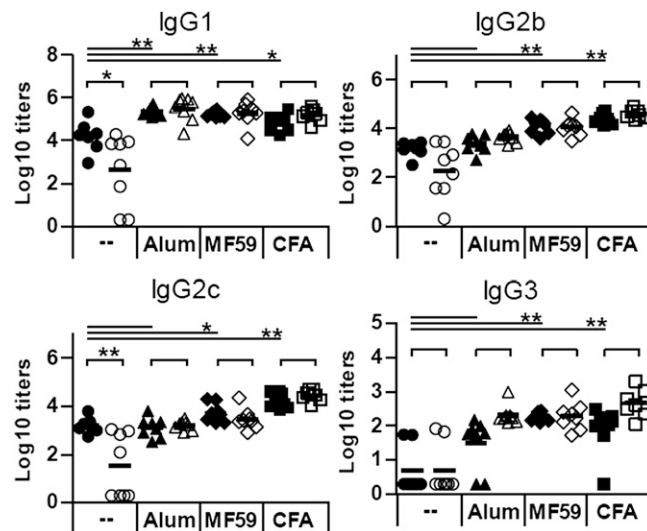

**Fig. S1.** Antibody titers in Nlrp3<sup>-/-</sup> mice and WT controls after vaccination with plain or adjuvanted MenB antigens. IgG subclasses IgG1, IgG2b, IgG2c, and IgG3 for one representative antigen (NHBA-GNA1030). Values represent titers of single mice (WT, filled symbols; KO, open symbols) and their mean value. Unpaired, two-tailed Student's *t* test was performed comparing WT vs. Nlrp3<sup>-/-</sup> and adjuvant vs. PBS injection (in WT mice). \**P* < 0.05 are considered significant and \*\**P* < 0.001 highly significant.

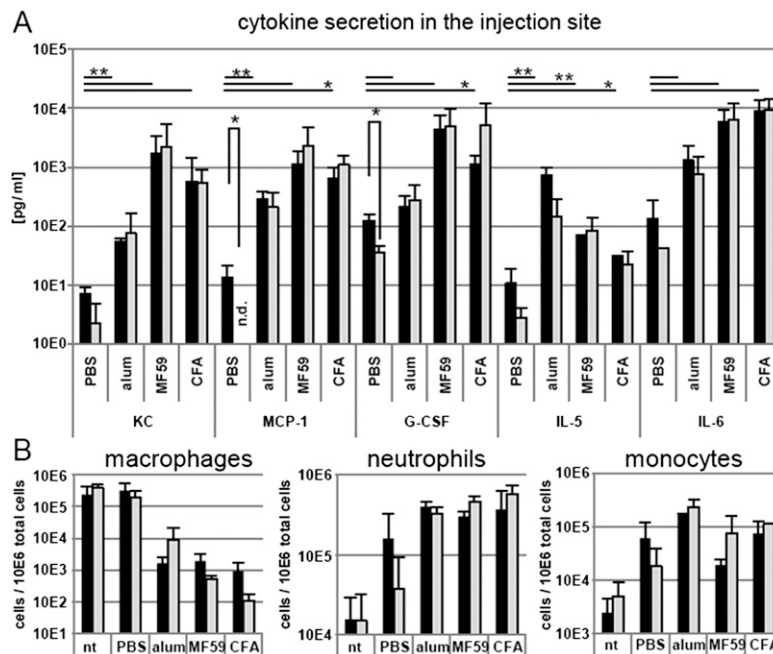

**Fig. S2.** Innate immune responses after adjuvant stimulation in Nlrp3<sup>-/-</sup> mice or WT controls. (A) Cytokine content in intraperitoneal washfluid 4 h after intraperitoneal adjuvant injection. Black bars: WT mice; gray bars: Nlrp3<sup>-/-</sup> mice. Values represent means of three mice plus SD. Unpaired, two-tailed Student's *t* test was performed comparing WT vs. Nlrp3<sup>-/-</sup> and adjuvant vs. PBS injection (in WT mice). \**P* < 0.05; \*\**P* < 0.01. (B) Cell recruitment events in the peritoneal cavity 4 h after adjuvant injection. Values are given per 10E6 total peritoneal cells and represent means of three mice per group plus SD.

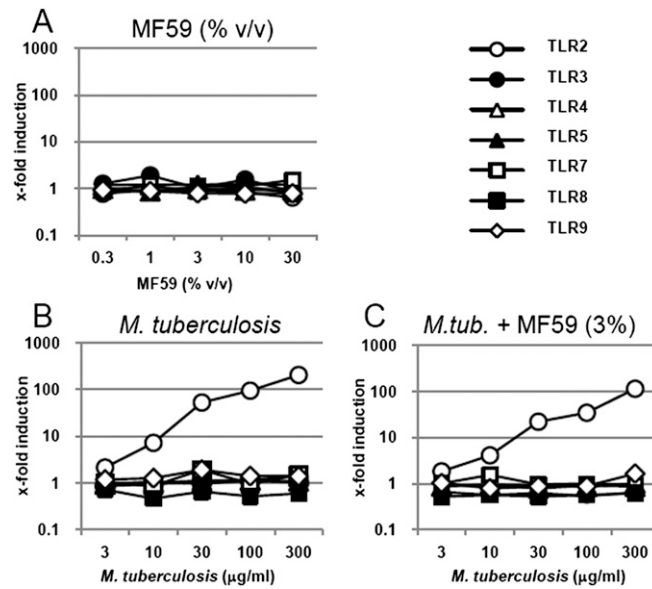

**Fig. S3.** In vitro activation of Toll-like receptor (TLR)-reporter cell lines. HEK293-NF- $\kappa$ B-Luc cells stably expressing the indicated human receptor were incubated with different concentrations of MF59 (% vol/vol) (A), of a *Mycobacterium tuberculosis* extract ( $\mu$ g/mL) in the absence (B) or in the presence (C) of MF59 (3% vol/vol). After 6 h, luciferase expression was measured and expressed as fold-induction compared with cells incubated with vehicle alone.

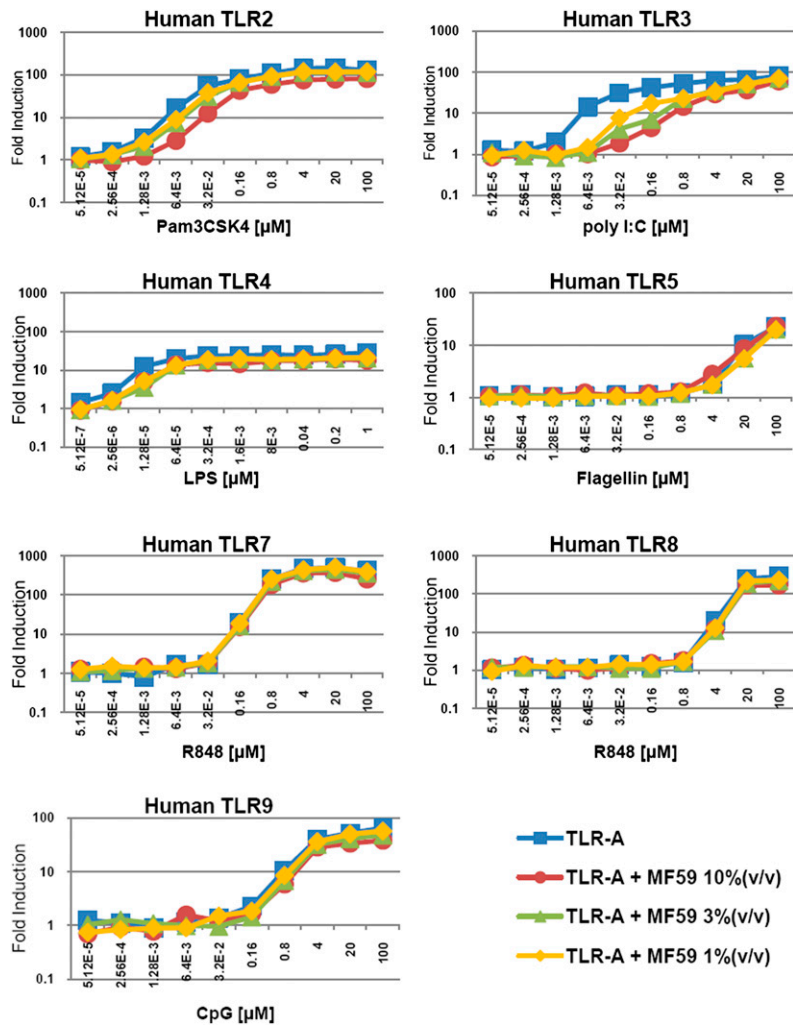

**Fig. S4.** Costimulation of different TLR-reporter cell lines with their respective agonist and MF59. HEK293-NF- $\kappa$ B-Luc cells stably expressing the indicated human receptor were incubated with different concentrations of the respective TLR agonist (TLR-A) in the absence or in the presence of MF59. After 6 h, luciferase expression was measured and expressed as fold-induction compared with cells incubated with vehicle alone.
